# Supplementary material for: Sustainability Evaluation of the Al-Qasab Playa by Integrating Hydrogeochemical and Graphical, ArcGIS Watershed, and Thermodynamic Geochemical Modeling Approaches
Source: MDPI journal article supplement (doi:10.3390/su16052118), 2024-03-04
Supplement: s1 [file s1]

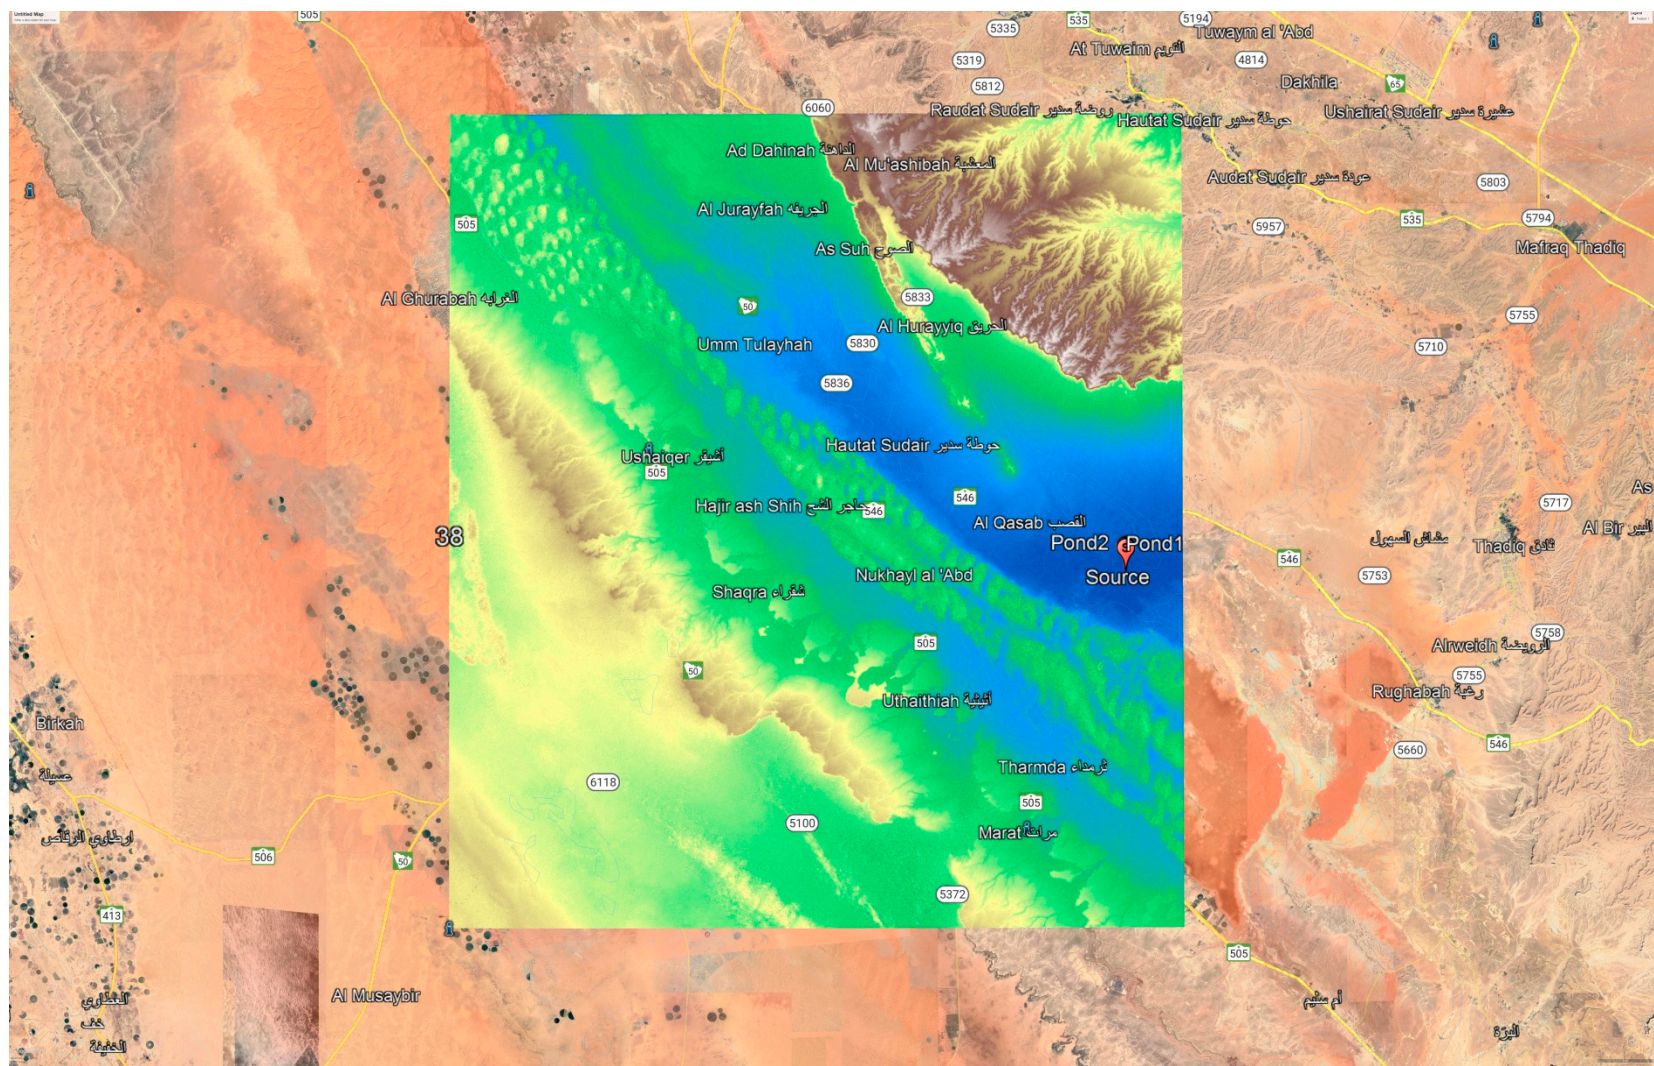



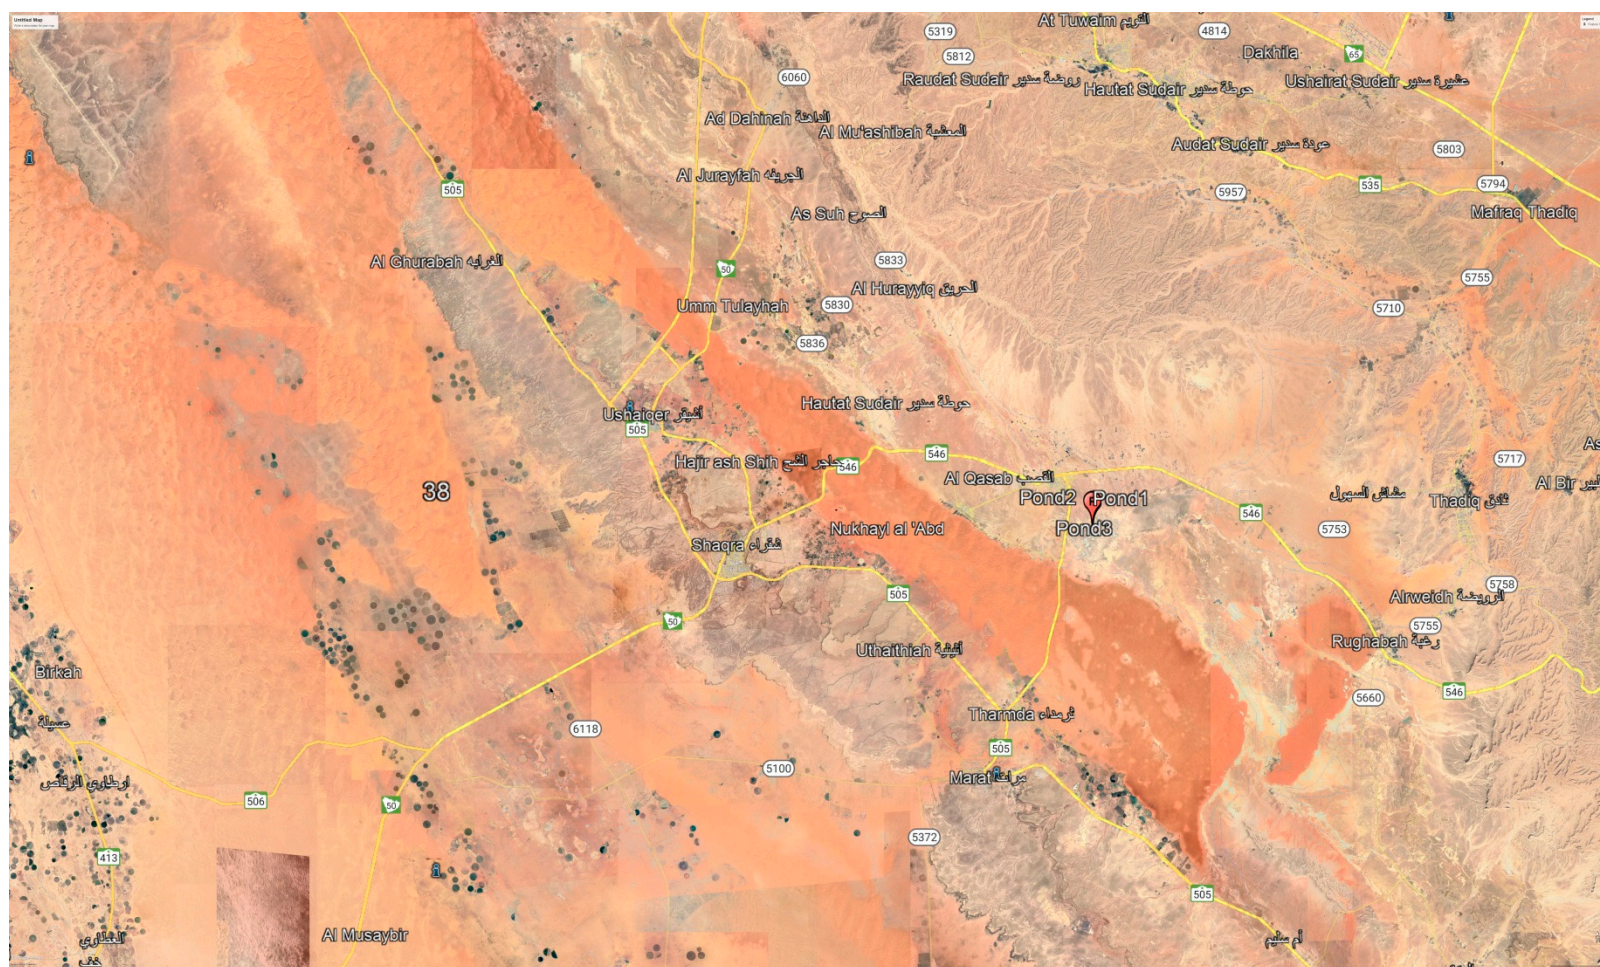

Figure S1



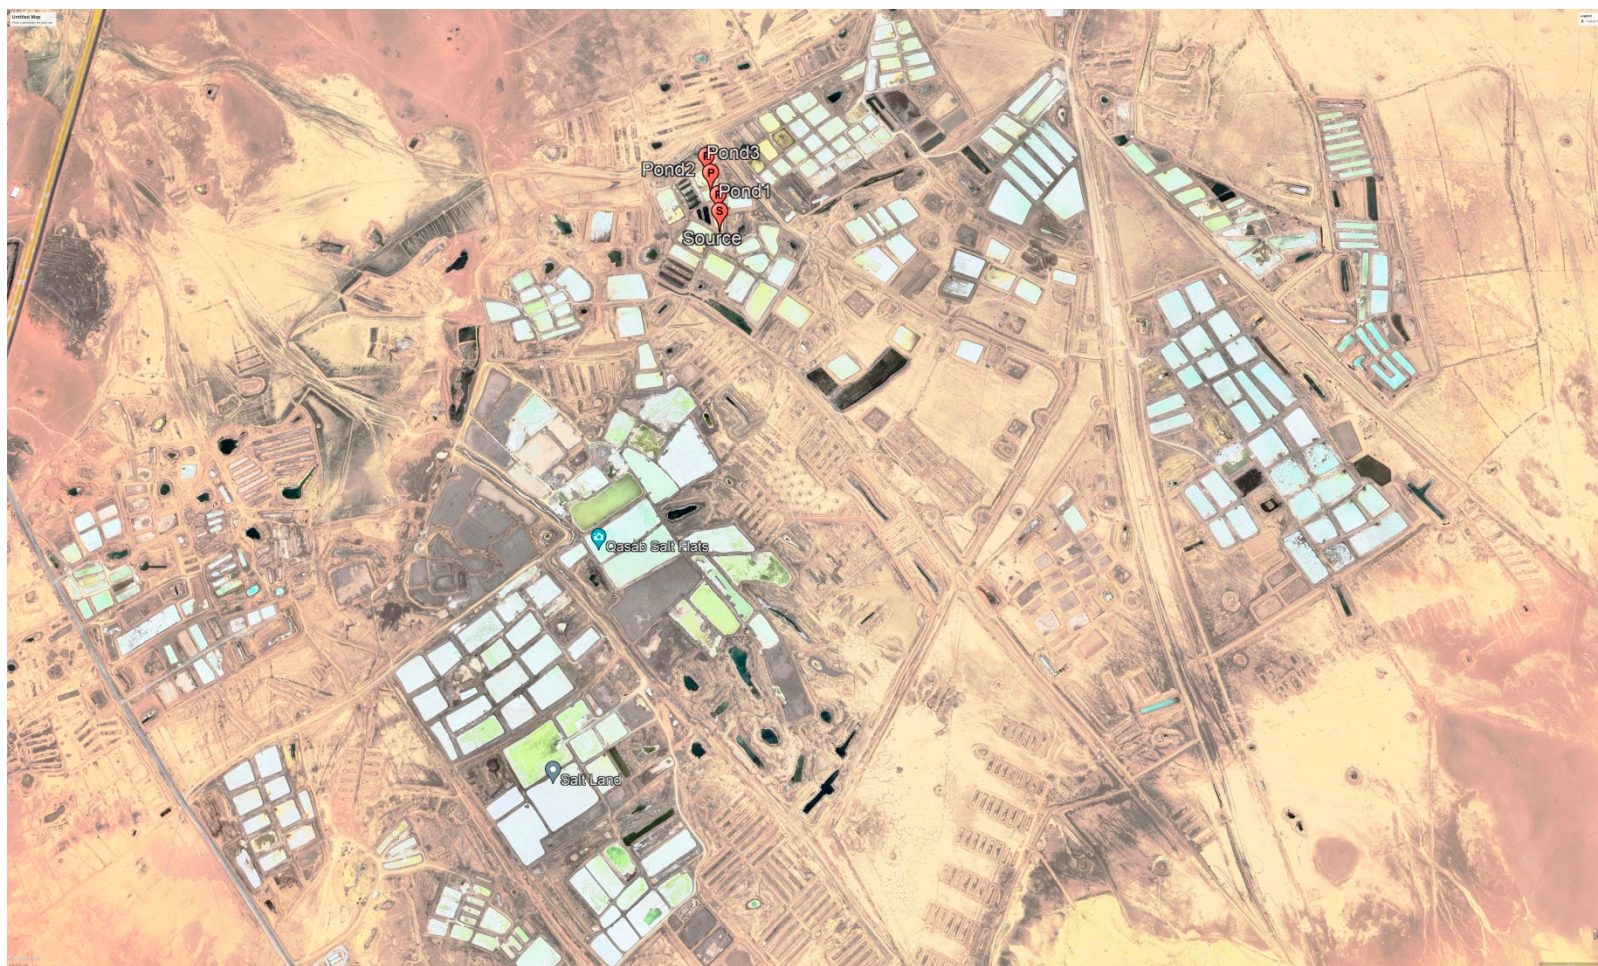

**Figure S1.** Areal view of the study area and the solar evaporation ponds.

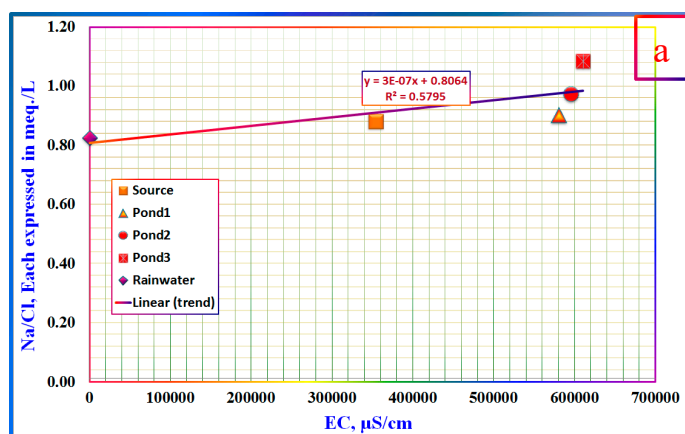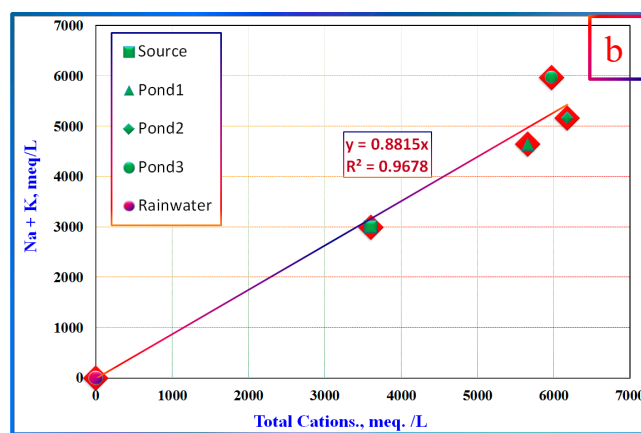

**Figure S2.** Relationship between  $\text{Na}^+/\text{Cl}^-$  ratio and EC (a) and that of the total cations versus Na + K in mEq/L.
