# Supplementary material for: Sustainability Evaluation of the Al-Qasab Playa by Integrating Hydrogeochemical and Graphical, ArcGIS Watershed, and Thermodynamic Geochemical Modeling Approaches
Source: MDPI journal article supplement (doi:10.3390/su16052118), 2024-03-04
Supplement: s1 [file s1]

Archive with 1 entries (1 files):
- sustainability-2888919-supplementary.pdf
